# Supplementary material
Source: PubMed Central journal article supplement (PMC1878531)
Supplement: JCI0731450sd.pdf [file JCI0731450sd.pdf]

**Supplemental Figure 1**

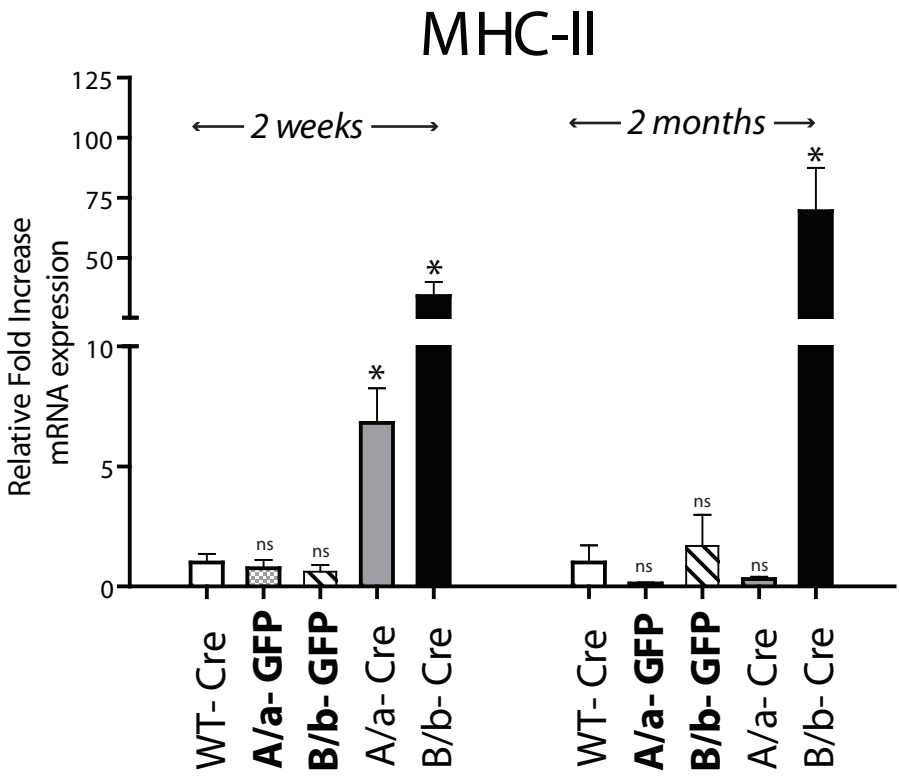

# Supplemental Table 1

| AMYLOID PLAQUE INDICES                     |                        |      |            |           |                  |                 |         |      |
|--------------------------------------------|------------------------|------|------------|-----------|------------------|-----------------|---------|------|
| Measure (Units)                            | Group                  | Side | Mean (raw) | SEM (raw) | Mean (i/c ratio) | SEM (i/c ratio) | p-value | Sig. |
| <b>Congo Red Plaque Staining (n=7)</b>     |                        |      |            |           |                  |                 |         |      |
| Area Fraction (% hippocampus)              | APP/PS1                | i    | 0.372      | 0.088     | 1.054            | 0.142           | 0.0014  | *    |
|                                            |                        | c    | 0.358      | 0.066     |                  |                 |         |      |
|                                            | APP/PS1 + IL-1 $\beta$ | i    | 0.145      | 0.029     | 0.433            | 0.050           |         |      |
|                                            |                        | c    | 0.362      | 0.081     |                  |                 |         |      |
| Frequency (plaques per section)            | APP/PS1                | i    | 27.57      | 3.45      | 1.163            | 0.118           | 0.0034  | *    |
|                                            |                        | c    | 25.00      | 3.70      |                  |                 |         |      |
|                                            | APP/PS1 + IL-1 $\beta$ | i    | 12.57      | 2.05      | 0.623            | 0.091           |         |      |
|                                            |                        | c    | 23.00      | 4.73      |                  |                 |         |      |
| <b>A<math>\beta</math> ELISA (n=6)</b>     |                        |      |            |           |                  |                 |         |      |
| Insoluble A $\beta$ 40 (pg/mg hippocampus) | APP/PS1                | i    | 229.89     | 45.49     | 1.128            | 0.162           | 0.0151  | *    |
|                                            |                        | c    | 218.81     | 55.23     |                  |                 |         |      |
|                                            | APP/PS1 + IL-1 $\beta$ | i    | 94.45      | 28.84     | 0.509            | 0.132           |         |      |
|                                            |                        | c    | 407.36     | 219.31    |                  |                 |         |      |
| Insoluble A $\beta$ 42 (pg/mg hippocampus) | APP/PS1                | i    | 1422.04    | 212.40    | 1.098            | 0.046           | 0.0050  | *    |
|                                            |                        | c    | 1289.73    | 174.73    |                  |                 |         |      |
|                                            | APP/PS1 + IL-1 $\beta$ | i    | 695.72     | 53.53     | 0.709            | 0.099           |         |      |
|                                            |                        | c    | 1164.63    | 278.84    |                  |                 |         |      |
| Soluble A $\beta$ 40 (pg/mg hippocampus)   | APP/PS1                | i    | 11.826     | 1.608     | 1.179            | 0.099           | 0.7612  | ns   |
|                                            |                        | c    | 10.065     | 0.968     |                  |                 |         |      |
|                                            | APP/PS1 + IL-1 $\beta$ | i    | 8.998      | 0.809     | 1.317            | 0.428           |         |      |
|                                            |                        | c    | 9.951      | 2.178     |                  |                 |         |      |
| Soluble A $\beta$ 42 (pg/mg hippocampus)   | APP/PS1                | i    | 7.756      | 1.232     | 1.636            | 0.506           | 0.4010  | ns   |
|                                            |                        | c    | 6.591      | 1.473     |                  |                 |         |      |
|                                            | APP/PS1 + IL-1 $\beta$ | i    | 3.676      | 0.611     | 1.013            | 0.499           |         |      |
|                                            |                        | c    | 6.601      | 1.788     |                  |                 |         |      |

# Supplemental Figure 2

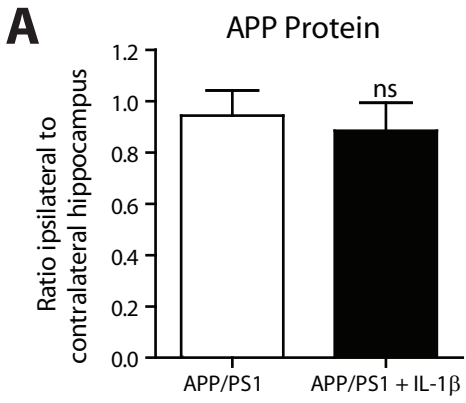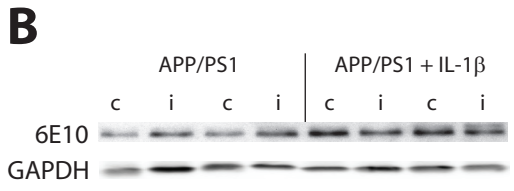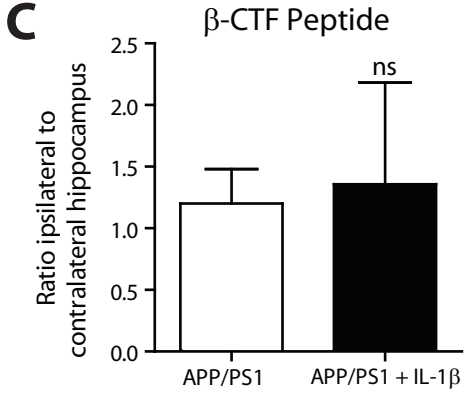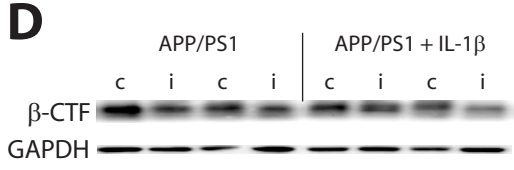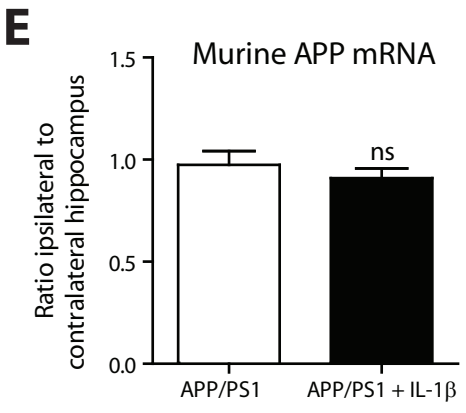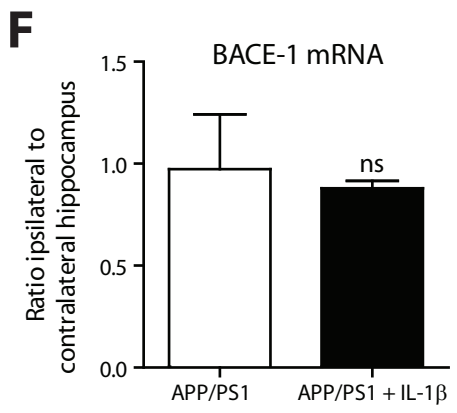

### Supplemental Figure 1

FIV-GFP control injections fail to elicit MHC-II induction in IL-1 $\beta$ <sup>XAT</sup> mice. Line A/a and B/b IL-1 $\beta$ <sup>XAT</sup> animals, as well as wild-type (WT) controls received unilateral intrahippocampal injections of either FIV-GFP or FIV-Cre. qRT-PCR analysis of MHC-II expression was performed at 2 weeks or 2 months following viral transduction in the ipsilateral (injected) hippocampus. As expected, FIV-GFP injections (graphed in bold) did not cause elevations in MHC-II expression in line A/a or B/b animals at either time point as compared to those injected with FIV-Cre (n=3-5 each group; graph represents mean  $\pm$  SEM; ns=not significant; \*=p<0.05).

### Supplemental Table 1

Detailed Statistics of Amyloid Plaques and Peptides. This table lists the mean and standard error of the mean (SEM) of the data collected from both Congo red plaque staining and A<sub>β</sub> ELISAs within the hippocampi of APP<sup>swe</sup>/PS1<sup>dE9</sup> (APP/PS1) and IL-1 $\beta$ <sup>XAT</sup> line B/b + APP<sup>swe</sup>/PS1<sup>dE9</sup> (APP/PS1 + IL-1 $\beta$ ) mice in Fig. 5. The side analyzed is denoted by i=ipsilateral or c=contralateral. Mean (raw) and SEM (raw) describe analysis on raw data generated in each treatment group. Mean (i/c ratio) and SEM (i/c ratio) describe analysis based on the ratio of the pathologic index within the ipsilateral vs. contralateral hippocampus of each animal. The i/c ratio provides a better representation of reductions in amyloid pathology because of the wide variability in pathologic lesions detected between individual animals. The p-value was calculated from a t-test comparing i/c ratios between APP/PS1 and APP/PS1 + IL-1 $\beta$  groups of animals, with significance (sig.) established at p<0.05 (\*=significant; ns=not significant).

### Supplemental Figure 2

IL-1 $\beta$  expression does not modulate APP and BACE-1 expression or BACE-1 enzymatic activity in APP/PS1 + IL-1 $\beta$  Mice. Amyloid precursor protein (APP) expression (A,B) was analyzed using the 6E10 antibody by Western blot (normalized to GAPDH) and did not reveal significant differences in expression between APP/PS1 and APP/PS1 + IL-1 $\beta$  groups of animals. (C,D) We next examined the activity of BACE-1 via detection of the product of its cleavage of APP, the beta C-terminal fragment ( $\beta$ -CTF). We did not detect significant differences in  $\beta$ -CTF levels between groups of animals. qRT-PCR analysis of (E) murine APP and (F) BACE-1 gene transcript expression also did not detect significant differences between the groups (n=6-7 each group; ns=not significant; graphs represent mean  $\pm$  SEM).
